# Supplementary material for: Naturally Occurring Mutations in Large Surface Genes Related to Occult Infection of Hepatitis B Virus Genotype C
Source: PLoS One. 2013 Jan 18;8(1):e54486. doi: 10.1371/journal.pone.0054486 (PMC3548799; doi:10.1371/journal.pone.0054486)
Supplement: Table S1 — Summary of mutations and deletions in the HBV surface and an overlapped polymerase region observed from 41 occult subjects. (XLSX) [file pone.0054486.s001.xlsx]

## Sheet: Sheet1
	Table S1. Summary of mutations and deletions in the HBV surface and overlapped polymerase region observed from 41 occult subjects.
	No.	Isolates	Age/Sex	Serotypes	Province	PreS1	PreS2	S	Polymerase	Premature stop	Deletion	Hepatocyte binding site	a-determinant	Subclones (n)	GenBank No.
	1	0627-18	5/F	adr	Cheju	Deletion in preS1 1-6		V177A, Stop codon at amino acid 182	Deletion in spacer6-12, rtI/N/F470L, Stop codon at rt245	S (182), Polymerase (rt245)	PreS1 (1-6), Polymerase (spacer6-12)	−	−	4	HQ659504
	2	0627-23	73/F	adr	Cheju	W4P, K/Q10R, S17A, V18I, P32L, W43R, H51P, P70L, I84T	Stop codon at amino acid 3, Deletion in preS2 8-21, F/L22I	L39P, I/T126N, W182L	spacerL9P, spacerF22C, spacerC23Y, spacerS/P27A, spacerL48S, spacerA70T, spacerE128K, Deletion in spacer132-147	PreS2 (3)	PreS2 (8-21), Polymerase (spacer132-147)	S17A, V18I, P32L, W43R	−	4	HQ659505
	3	0627-26	65/F	adr	Cheju			S6A, S58L, C65Y, S/R204N	rtI16S, rtT26A, rtL68P, rtM252V	−	−	−	−	4	HQ659506
	4	0627-28	22/M	adr	Cheju	Deletion in preS1 1-6		A17T	rtG27D, rtI/N124L, rtS145P, rtY160H, rtK170E, rtT242I	−	PreS1 (1-6)	−	−	5	HQ659507
	5	0627-57	58/F	adr	Cheju	W4P, K/Q10R, S17A, P32L, W43R, H51P, I84T	Stop codon at amino acid 3, Deletion in preS2 8-22	I/T126N, W182L	spacerL9P, spacerF22C, spacerS27A, spacerL48S, spacerA70T, spacerE128K, Deletion in spacer132-146, rtS77P, rtD136E	PreS2 (3)	PreS2 (8-22), Polymerase (spacer132-146)	S17A, P32L, W43R	I/T126N	4	HQ659508
	6	0628-18	66/F	adr	Cheju	Deletion in preS1 1-6		Stop codon at amino acid 182, F212L	rtV32I, rtI/N124L, rtF180L, L222P, Stop codon at amino acid rt245	S (182), Polymerase (rt245)	PreS1 (1-6)	−	−	4	HQ659509
	7	0629-27	39/M	adr	Cheju	P79H		S204N		−	−	−	−	3	HQ659510
	8	0629-31	33/M	adr	Cheju	Deletion in preS1 1-6		I150T, Stop codon at amino acid 182	spacerS98P, spacerS141G, rtI/N124L, rtG234S, Stop codon at amino acid rt245	S (182), Polymerase (rt245)	PreS1 (1-6)	−	−	6	HQ659511
	9	0630-6	62/F	adr	Cheju	I/H/N48S, A62T, I84T, V88A		A166V, I195M	spacerF22L, spacerS24A, spacerS67N, spacerA70S, spacerH89Y, spacerP133S, spacerN155D, rtQ127K, rtL182M, rtM206V	−	−	−	−	2	HQ659512
	10	0630-7	75/F	adr	Cheju	A62T, I84T		A166V, I195M	spacerF22L, spacerC23G, spacerS24A, spacerS67N, spacerA70S, spacerH89Y, spacerP133S, rtQ127K, rtL182M, rtM206V	−	−	−	−	3	HQ659513
	11	0630-58	26/F	adr	Cheju		S5A	L22V, I/T126S	spacerF/L129R, spacerS136F, rtV32G, rtD136E	−	−	−	I/T126S	3	HQ659514
	12	0630-61	27/F	adr	Cheju	Start codon at amino acid 12 (M1V), H71L		F41I, P105L, L209W, P217L	spacerS85A, spacerS93R, spacerG124S, spacerQ/E142K, rtF51Y	−	−	−	−	2	HQ659515
	13	0630-68	27/F	adr	Cheju	Deletion in preS1 1-8, N40S, F/L45S, P65A	S5A	I/T126S	spacerA70G, spacerF/L129R, spacerS136F, spacerL151F, spacerS160P, rtD136E, rtT242A	−	PreS1 (1-8)	N40S	I/T126S	4	HQ659516
	14	0701-32	36/F	adr	Cheju	W4P, K/Q10R, S17A, P32L, W43R, H51P, I84T	Stop codon at amino acid 3, Deletion in preS2 8-22	V/T47M, P67S, T116A, I/T126N, W182L	spacerL9P, spacerF22C, spacerS27A, spacerL48S, spacerA70T, spacerE128K, Deletion in spacer132-145, rtS77L, rtG109R, rtN/H/Y126C, rtD136E	PreS2 (3)	PreS2 (8-22), Polymerase (spacer132-145)	S17A, P32L, W43R	I/T126N	5	HQ659517
	15	0701-44	81/F	adr	Cheju	Deletion in preS1 58-119		Stop codon at amino acid 69, I/T126S	spacerC23G, Deletion in spacer64-124, spacerS139P	S (69)	PreS1 (58-119), Polymerase (spacer64-124)	−	−	4	HQ659518
	16	0701-45	52/F	adr	Cheju	A90V		S58F, N59H, I68N, I82Q, I92T, L95V, V96G, I/T126S, P151S, I218T	spacerS139P, rtQ69P, rtN78K, rtH92P, rtV105G, rtD136E, rtS161F, rtS258C	−	−	−	I/T126S	4	HQ659519
	17	0704-8	57/M	adr	Cheju	W4P, K7E, K/Q10R, S17A, P32L, W43R, H51P, I84T	Stop codon at amino acid 3, Deletion in preS2 8-22, S40P	I/T126N, W182L, I195M	spacerL9P, spacerF22C, spacerS27A, spacerL48S, spacerA70T, spacerE128K, Deletion in spacer132-146, spacerL164P, rtD136E, rtM206V	PreS2 (3)	PreS2 (8-22), Polymerase (spacer132-146)	S17A, P32L, W43R	I/T126N	4	HQ659520
	18	0704-55	32/M	adr	Cheju	Stop codon at amino acid 104		V/T47A, W182L	spacerH90L, spacerA/T110I	PreS1 (104)	−	−	−	8	HQ659521
	19	0704-57	30/M	adr	Cheju	Stop codon at amino acid 104		T/V47A, T115S, T123A	spacerH89L, spacerA/T109I, rtN125I, rtN/D133G	PreS1 (104)	−	−	−	6	HQ659522
	20	0704-60	29/M	adr	Cheju	Deletion in preS1 1-6		M75I, L173P, W182L	spacerP133S, spacerI/V145L, rtV86M	−	PreS1 (1-6)	−	−	4	HQ659523
	21	0704-61	54/M	adr	Cheju	Deletion in preS1 1-6		T125A, Q181R, W182L	spacerP133S, spacerI/V145L, rtH135R, rtV192I	−	PreS1 (1-6)	−	T125A	4	HQ659524
	22	0704-62	35/M	adr	Cheju	H51R, A81V, Stop codon at amino acid 104		C221R	spacerH89L, Stop codon at spacer138, rtN78D, rtL231S	PreS1 (104), Polymerase (spacer138)	−	−	−	8	HQ659525
	23	0704-65	29/F	adr	Cheju	W4P, K/Q10R, S17A, P32L, W43R, H51P, I84T, I/L108T	Stop codon at amino acid 3, Deletion in preS2 8-22	I/T126N, W182L	spacerL9P, spacerF22C, spacerS27A, spacerL48S, spacerA70T, spacerE128K, Deletion in spacer132-146, rtD136E	PreS2 (3)	PreS2 (8-22), Polymerase (spacer132-146)	S17A, P32L, W43R	I/T126N	5	HQ659526
	24	0705-12	75/M	adr	Cheju	Start codon at amino acid 12 (M1K)		W172R	rtL182P, rtK214E, rtL249H	−	−	−	−	3	HQ659527
	25	0705-66	52/M	adr	Cheju	Start codon at amino acid 12 (M1K), F24S, I84M			spacerS117P, rtI124L, rtS161P, rtK214E, rtG246C, rtL249H	−	−	−	−	4	HQ659528
	26	0705-68	55/M	adr	Cheju	Deletion in preS1 1-6		A17T, A157T	rtG27D, rtS145P, rtY160H, rtG167D, rtK170E	−	PreS1 (1-6)	−	−	4	HQ659529
	27	0711-37	43/F	adr	Cheju	Deletion in preS1 65-80, R99Q	S27Y, N33D	P111L	Deletion in spacer70-86, spacerK157R, spacerS/T165A, rtN73D, rtN181D	−	PreS1 (65-80), Polymerase (spacer70-86)	−	−	4	HQ659530
	28	0711-75	51/M	adr	Cheju		Deletion in preS2 13-23	W36L, V/T47K, N52D	Stop codon at spacer25, spacerV127M, Deletion in spacer138-147, rtR/H57Q, rtK62R	Polymerase (spacer25)	PreS2 (13-23), Polymerase (spacer138-147)	−	−	4	HQ659531
	29	0713-25	59/F	adr	Cheju	Deletion in preS1 1-6	P54R	N/S3T, Stop codon at amino acid 182	rtE13D, rtN/I124L, Stop codon at rt245	S (182), Polymerase (rt245)	PreS1 (1-6)	−	−	4	HQ659532
	30	0713-34	49/M	adr	Cheju	Deletion in preS1 1-6, A55T	N4S		Deletion in spacer6-11, spacerG/S/R60D, rtN/I124L	−	PreS1 (1-6), Polymerase (spacer6-11)	−	−	4	HQ659533
	31	0714-34	57/F	adr	Cheju	Deletion in preS1 1-6, F45Y		I25V, T116A, T140A	Deletion in spacer6-12, rtN35S	−	PreS1 (1-6), Polymerase (spacer6-12)	−	T140A	4	HQ659534
	32	0714-37	30/F	adr	Cheju	S38P, D44G		L42P, L175I	spacerF/L43P, rtP101S, rtN/I124L, rtF185Y, rtC200R, rtK277E	−	−	S38P	−	2	HQ659535
	33	0714-38	24/F	adr	Cheju			N40I, S61L, C65G, P66L	rtQ50H, rtL75W, rtR112G, rtN/I124L	−	−	−	−	4	HQ659536
	34	KU-I-26	54/F	adr	Chungju	W4R, W43R, T87A, I108V		Q16R, I/T126S, G130N	spacerL9S, spacerN/H92S, spacerH113R, rtD136E, rtR140K, rtK151Q, rtK214E	−	−	−	I/T126S, G130N	2	HQ659537
	35	KU-II-28	42/M	adr	Chungju	K/Q10R, L75S, Deletion in preS1 102-117	F8V, S28R, P54Q	L32P, V/T47A, P66H, F85S, C107W, G145R, S171P, Stop codon at amino acid 182	Deletion in spacer107-122, spacerF/I/L132S, spacerP133S, spacerF153I, rtS118A, rtN/T120S, rtW/R155Q, rtL181P, rtV193I	S (182)	PreS1 (102-117), Polymerase (spacer107-122)	−	G145R	4	HQ659538
	36	KU-II-41	30/F	adr	Chungju	P41Q	P54Q	G10R, V/T47A, R79H, T131I, Stop codon at amino acid 182	Stop codon at spacer32, spacerP133S, rtI18V, rtR20K, rtV193I	S (182), Polymerase (spacer32)	−	P41Q	T131I	2	HQ659539
	37	KU-II-46	36/F	adr	Chungju	W4R, K7Q, N46H, A90V, T97I, N98T		M1T, V14G, A17E, L42R, I/T126S, G130N, T131I, W172L, P217L	spacerL8S, spacerQ12P, spacerQ51P, spacerR/G78W, spacerQ103H, spacerV/I145L, spacerY3162H, rtT9S, rtG12R, rtD136E, rtR140K	−	−	−	I/T126S, G130N, T131I	2	HQ659540
	38	KU-III-30	35/M	adr	Chungju	A91V	M1V, Q10P, Deletion in preS2 13-22	L84F, L104W, P127T, Q129H, M133T, F134V	spacerF11L, spacerS96C, spacerH125R, Deletion in spacer137-146, rtP94L, rtM131V, rtS137Y, rtN141E, rtV144G	−	PreS2 (13-22), Polymerase (spacer137-146)	−	P127T, Q129H, M133T, F134V	4	HQ659541
	39	KU-III-40	30/F	Untypeable	Chungju	Deletion in preS1 3-9 & 63-81, D50E, A55E	Q2P, L12Q, G26D	L39P, M103T, T125A, G145R, S155F, K/R160S, Stop codon at amino acid 182	spacerS/P/Q56A, Deletion in spacer78-87, spacerD/H91N, Stop codon at amino acid spacer150, rtI171L, rtH135R	S (182), Polymerase (spacer150)	PreS1 (3-9, 63-81), Polymerase (spacer78-87)	−	T125A	4	HQ659542
	40	KU-III-44	41/F	adw	Chungju	L30S, D31G	M1V, S5C, T6K	V/T47A, S61L, Q101K, N146D, I195M	spacerS21F, spacerF22V, spacerA126T, rtL82I, rtK156R, rtL182M, rtM206V	−	−	L30S, D31G	N146D	4	HQ659543
	41	KU-III-54	34/F	adr	Chungju	L30S	M1I, S5C, T6K	V/T47A, S61L, Q101K, S136F, N146D, I195M	spacerS21F, spacerF22V, spacerA126T, spacerT195A, rtL82I, rtK156R, rtL182M, rtM206V	−	−	L30S	S136F, N146D	6	HQ659544
	Note. M552V/I substitutions are YMDD mutants which have resistance to the lamivudine, anti-HBV treatment.												Sum	165
